# Supplementary material for: Catalyzed ring transformation of cyclic N-aryl-azadiperoxides with participation of α,ω-dithiols
Source: Royal Society of Chemistry journal article supplement (doi:10.1039/d0ra09758f), 2021-01-01
Supplement: d0ra09758f1.pdf [file d0ra09758f1.pdf]

## Supporting information

### Catalyzed ring transformation of cyclic *N*-aryl-azadiperoxides with participation of $\alpha,\omega$ -dithiols

Nataliya N. Makhmudiyarova,\* Kamil R. Shangaraev, Irina R. Ishmukhametova, Askhat G. Ibragimov, and Usein M. Dzhemilev

*Institute of Petrochemistry and Catalysis, Russian Academy of Sciences, 141  
prospekt Oktyabrya, 450075 Ufa, Russian Federation.  
Email: [natali-mnn@mail.ru](mailto:natali-mnn@mail.ru)*

#### -Table of Contents-

|                        |        |
|------------------------|--------|
| A. General Information | page 1 |
| B. Copy of NMR spectra | page 2 |
| C. References          | page 7 |

#### A. General Information

**General Remarks.** All reactions were performed at room temperature in air in round-bottom flasks equipped with a magnetic stir bar. The NMR spectra were recorded on a Bruker Avance 500 spectrometer at 500.17 MHz for  $^1\text{H}$  and 125.78 MHz for  $^{13}\text{C}$  according to standard Bruker procedures.  $\text{CDCl}_3$  was used as the solvent, and tetramethylsilane, as the internal standard. The mixing time for the NOESY experiments was 0.3 sec. Mass spectra were recorded on a Bruker Autoflex III MALDI TOF/TOF instrument with  $\alpha$ -cyano-4-hydroxycinnamic acid as a matrix. Samples were prepared by the dried droplet method. The C, H, and N were quantified by a Carlo Erba 1108 analyzer. The oxygen content was determined on a Carlo Erba 1108 analyzer. The progress of reactions was monitored by TLC on Sorbfil (PTSKh-AF-A) plates, with a 5:1 hexane : EtOAc mixture as the eluent and visualization with  $\text{I}_2$  vapor. For column chromatography, silica gel MACHEREY-NAGEL (0.063-0.2 mm) was used.

The synthesis of the 10-aryl-7,8,12,13-tetraoxa-10-azaspiro[5.7]tridecanes **1**, **14-24** was as reported in the literature.<sup>1</sup> Spectral data for compounds **8**, **9**, **25-35** completely coincide with those described in the literature.<sup>2</sup> Spectral data for compounds **10-13** completely coincide with those described in the literature.<sup>3</sup>

**Catalyzed ring transformation reaction of 10-aryl-7,8,12,13-tetraoxa-10-azaspiro[5.7]tridecanes with  $\alpha,\omega$ -dithiols.** General procedure. A Schlenk vessel mounted on a magnetic stirrer was charged under argon with THF (5 mL), Co(OAc)<sub>2</sub> (5 wt.%), alkan- $\alpha,\omega$ -dithiols (1 mmol), and 10-aryl-7,8,12,13-tetraoxa-10-azaspiro[5.7]tridecanes<sup>17</sup> (1 mmol). The reaction mixture was stirred at ~20 °C for 20 h and THF was evaporated. Then CH<sub>2</sub>Cl<sub>2</sub> (10 mL) was added and the mixture was washed with water (4×5 mL). The organic layer was separated and purified by column chromatography on SiO<sub>2</sub> using 10 : 1 PE : EtOAc as the eluent to isolate pure heterocyclic product (compounds **8-13**, **25-35**). The progress of reactions was monitored by TLC, with a 5 : 1 hexane : EtOAc mixture as the eluent, visualization was performed with I<sub>2</sub> vapor.

## B. Copy of NMR spectra

<sup>1</sup>H-NMR spectrum of **3-(2-fluorophenyl)-1,5,3-dithiazepane 26**

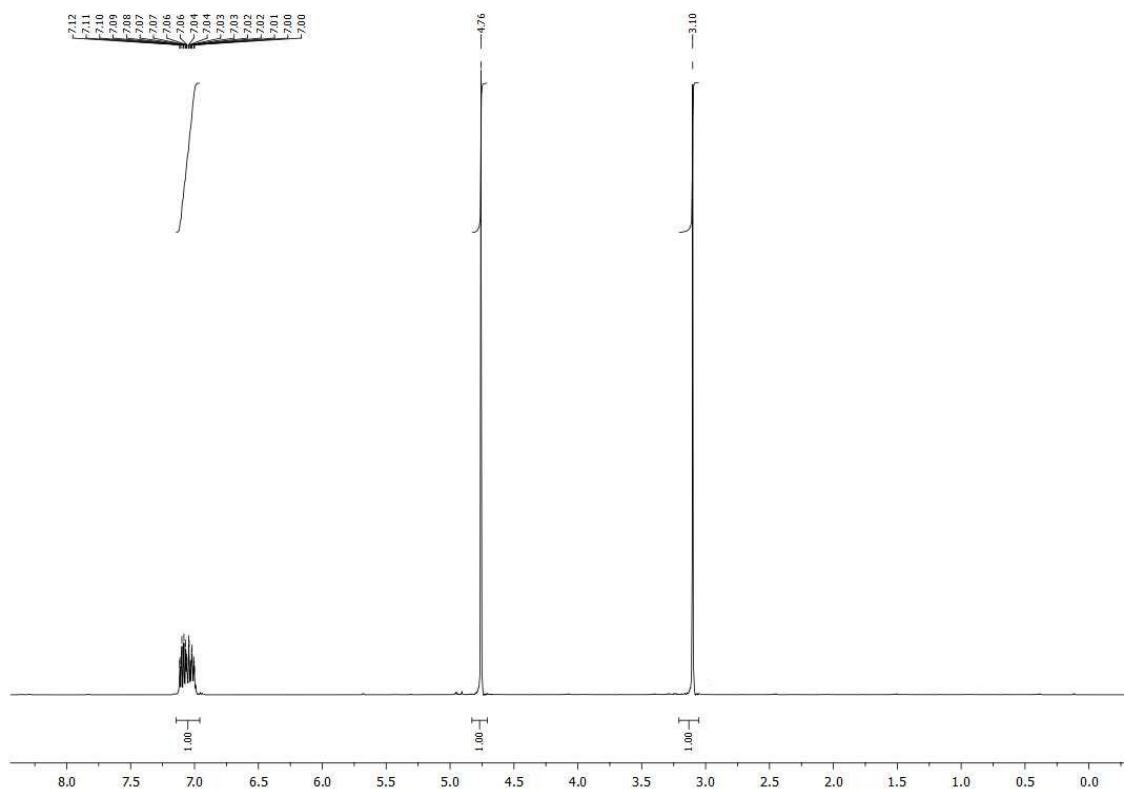

<sup>1</sup>H-NMR spectrum of **3-(3-fluorophenyl)-1,5,3-dithiazepane 22**

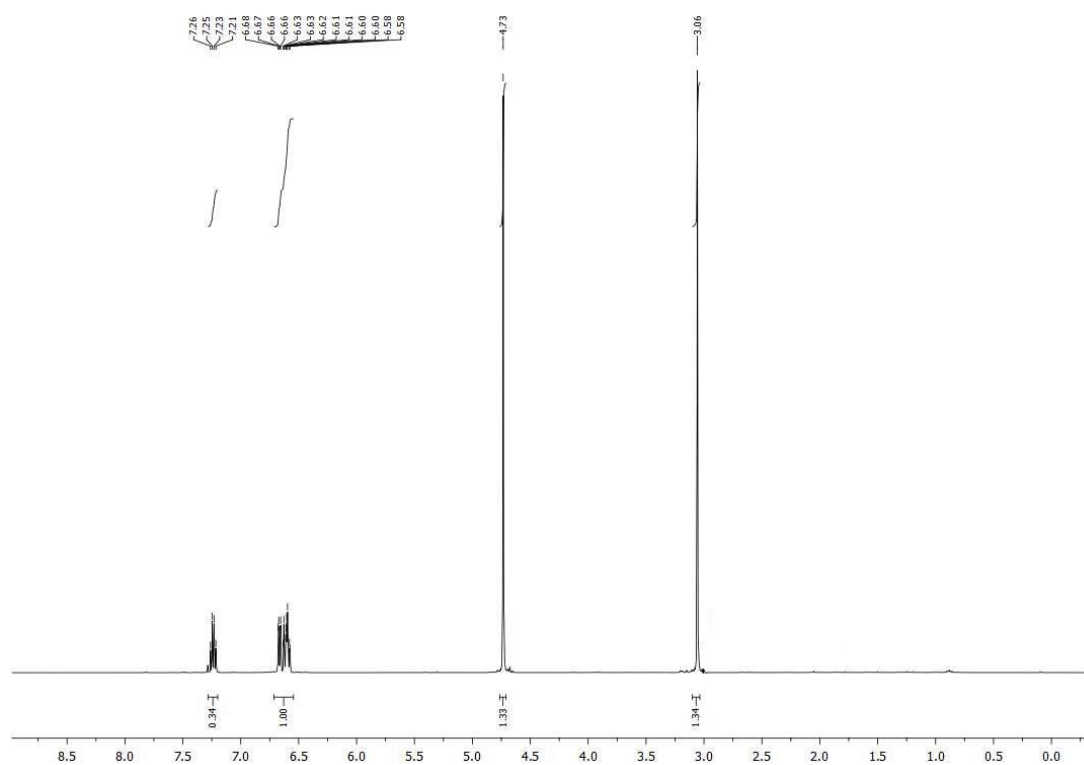

<sup>1</sup>H-NMR spectrum of **3-(4-fluorophenyl)-1,5,3-dithiazepane 28**

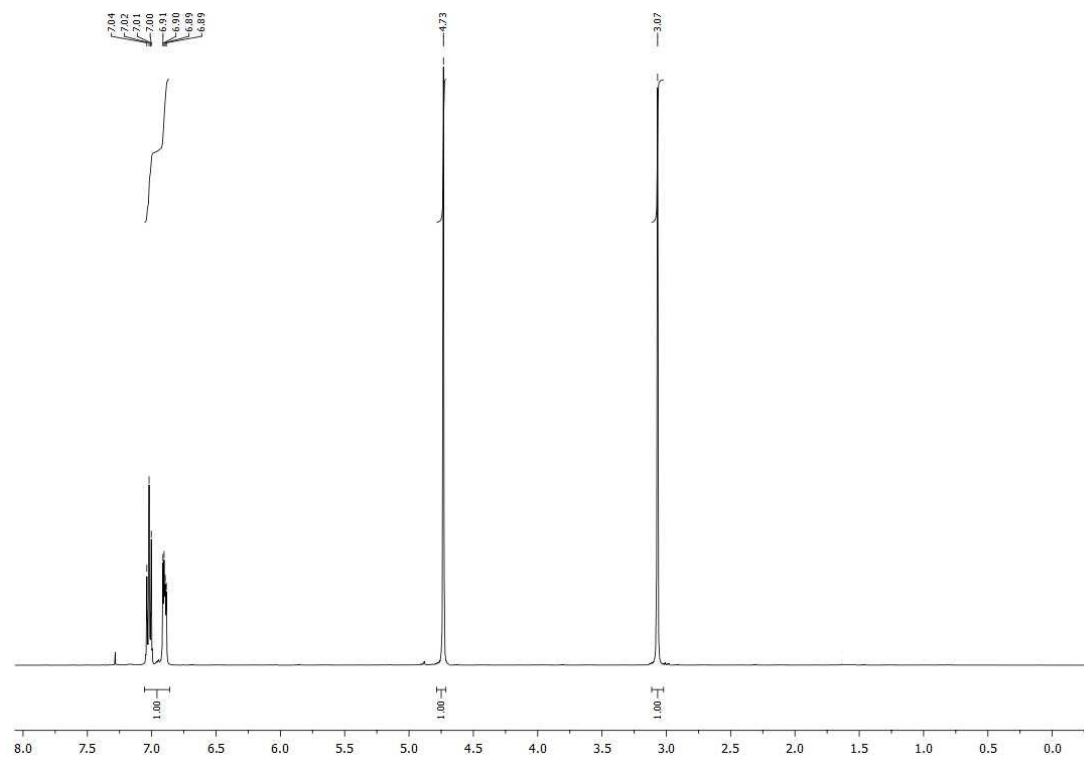

**<sup>1</sup>H-NMR spectrum of 3-(3-chlorophenyl)-1,5,3-dithiazepane 30**

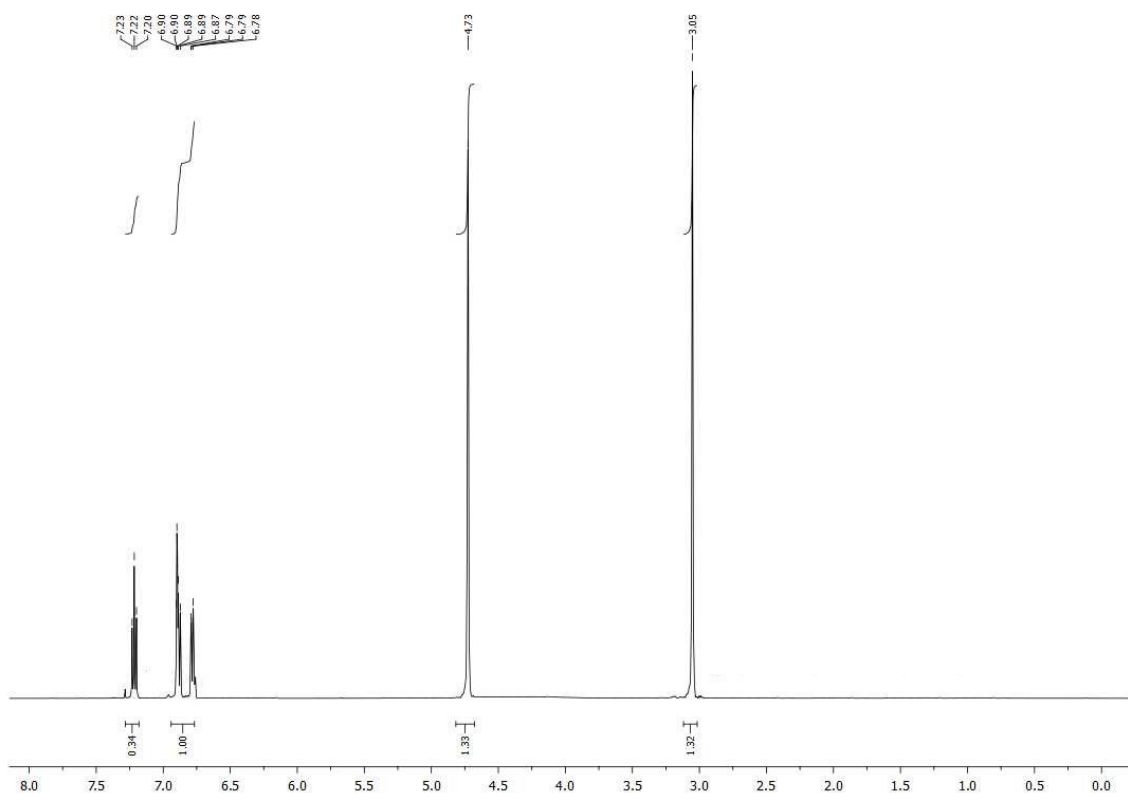

**<sup>1</sup>H-NMR spectrum of 3-(4-bromophenyl)-1,5,3-dithiazepane 33**

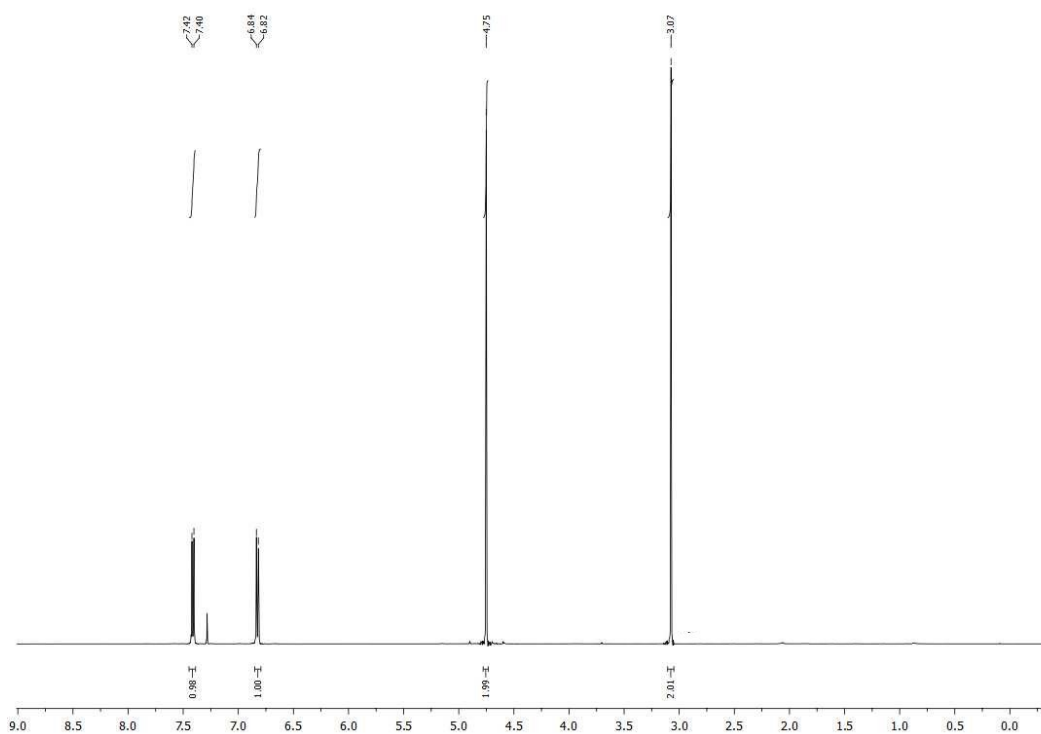

**<sup>1</sup>H-NMR spectrum of 3-(3-methylphenyl)-1,5,3-dithiazepane 35**

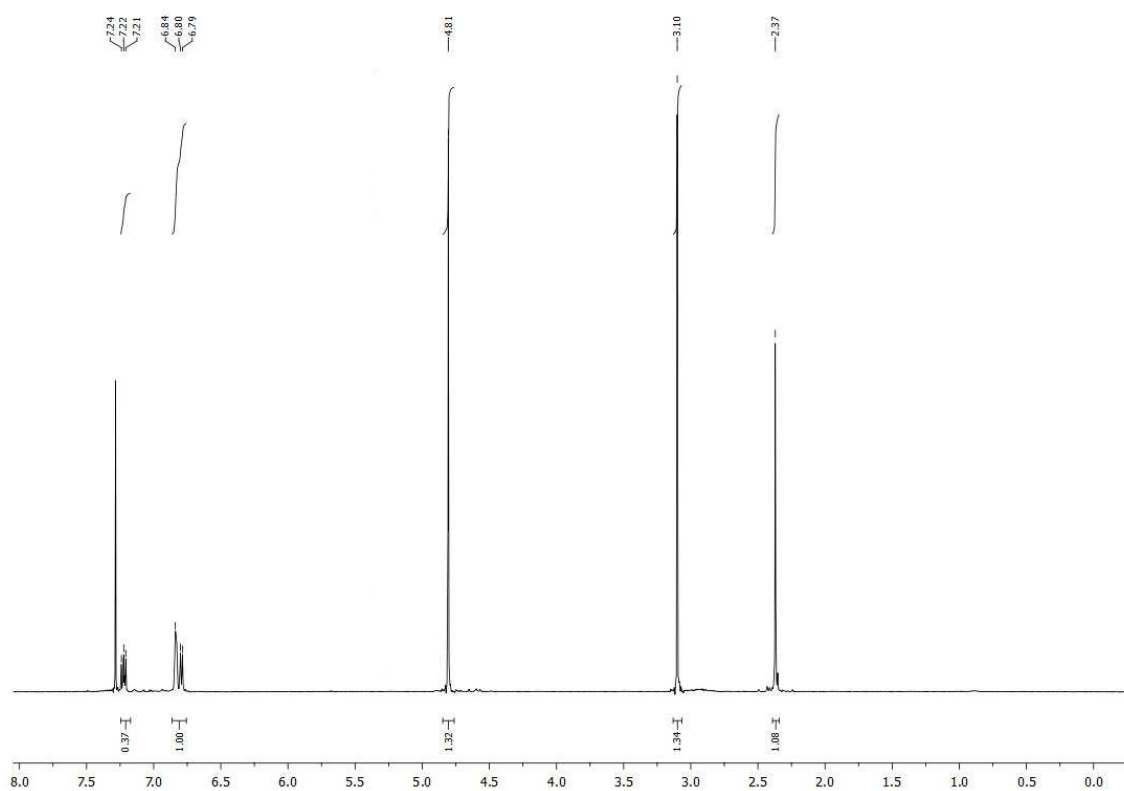

**<sup>1</sup>H-NMR spectrum of 9-phenyl-1,4-dioxo-7,11-dithia-9-azacyclotridecane 13**

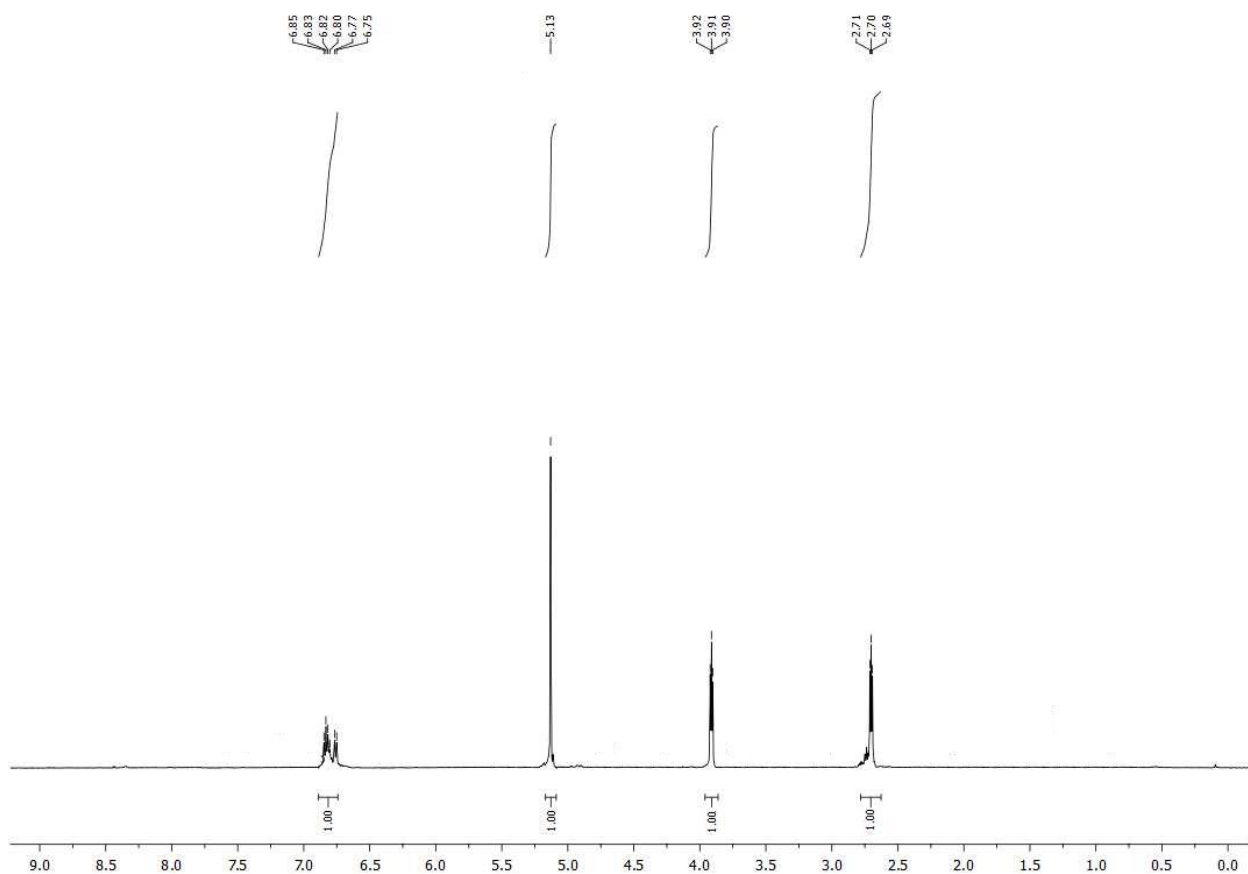

**<sup>1</sup>H-NMR spectrum of 3-phenyl-1,5,3-dithiazecane 11**

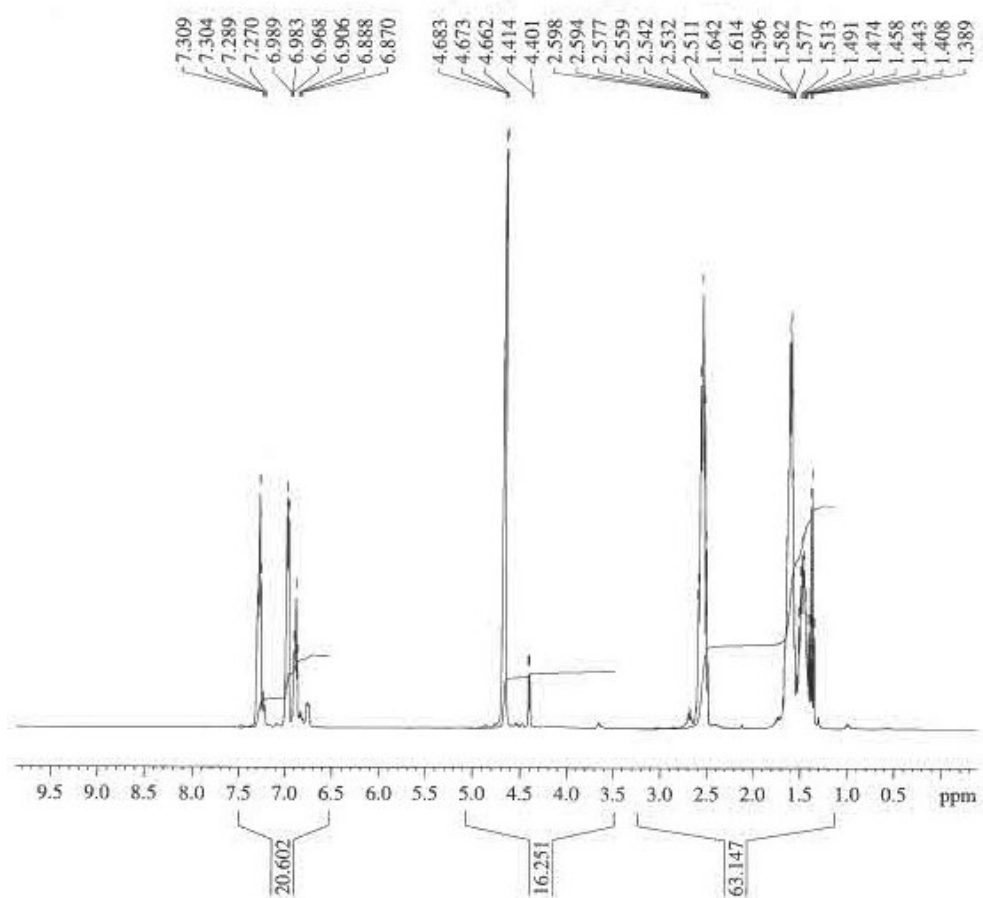

## <sup>1</sup>H-NMR spectrum of 3-phenyl-1,5-dithia-3-azacycloundecane12

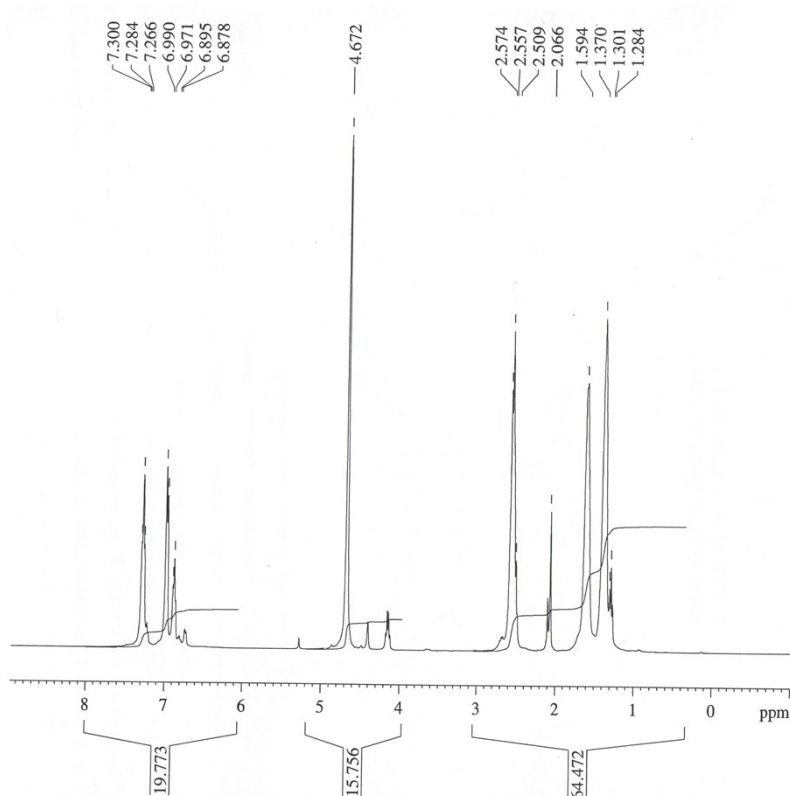

### C. References

1. N. N. Makhmudiyarova, G. M. Khatmullina, R. Sh. Rakhimov, E. S. Meshcheryakova, A. G. Ibragimov, U. M. Dzhemilev, *Tetrahedron*, 2016, **72**, 3277.
2. N. N. Murzakova, K. I. Prokof'ev, T. V. Tyumkina, A. G. Ibragimov, *Russ. J. Org. Chem.* 2012, **48**, 588.
3. N.N. Makhmudiyarova, L.V. Mudarisova, E.S. Meshcheryakova, A.G. Ibragimov, U.M. Dzhemilev, *Tetrahedron*, 2015, 71, 259.
